# Supplementary material
Source: publisher site journal article supplement (https://www.spandidos-publications.com/3614/downloadSupplementary)

Figure S1. Base line expression of cir-ATAD1 and miR-34b in Kasumi-3 cells, kasumi-6 cells, healthy samples and AML samples. (A) Baseline expression of cir-ATAD1 and GAPDH in the nuclei and cytoplasm of Kasumi-3 and kasumi-6 cells; expression of GAPDH was normalized to '1'. (B) Baseline expression of miR-34b and U6 in the nuclei and cytoplasm of Kasumi-3 and kasumi-6 cells; expression of U6 was normalized to '1'. Mean values of 3 replicates RW presented. \*\*P<0.01. AML, acute myelogenous leukemia; circ, circular RNA; miR, microRNA.

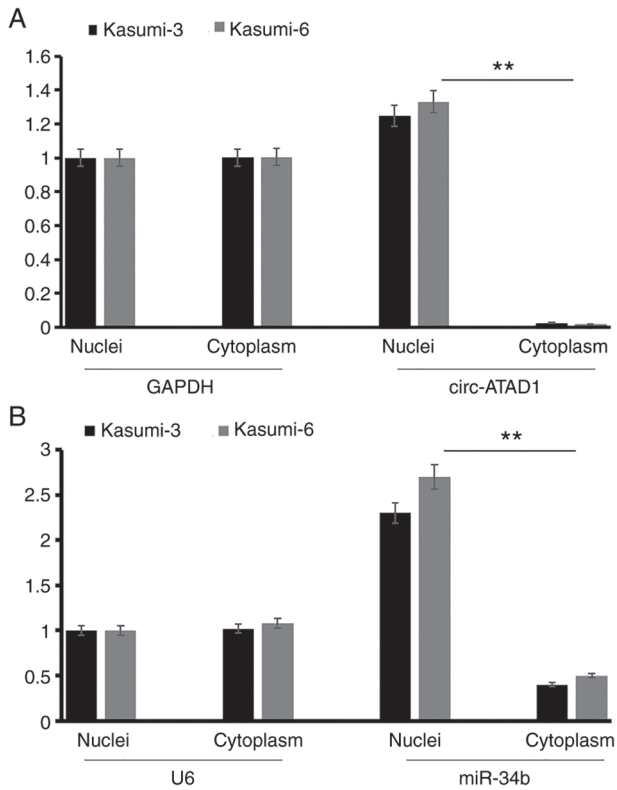

Figure S2. Cellular localization of circ-ATAD1 in AML cells. fluorescence *in situ* hybridization/immunofluorescence assay results of circ-ATAD1 expression in AML cell lines Kasumi-3 and Kasumi-6, respectively. Green fluorescence signal indicates circ-ATAD1, the red signal indicates histone-3, and the blue signal indicates DAPI staining. Scale bar, 25  $\mu$ m. AML, acute myelogenous leukemia; circ, circular RNA; miR, microRNA.

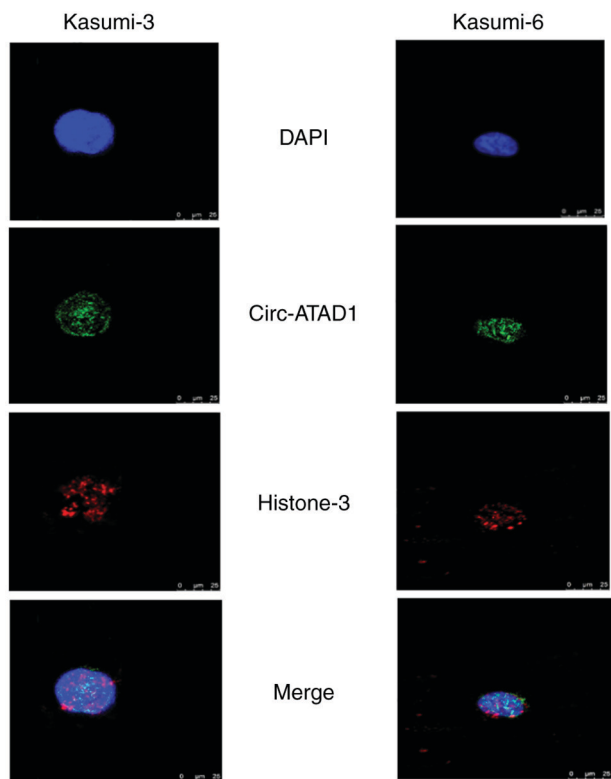

Supplement: Supplementary file 1 [file downloadSupplementary]
